# Supplementary material for: Activation of iNKT Cells Facilitates Liver Repair After Hepatic Ischemia Reperfusion Injury Through Acceleration of Macrophage Polarization
Source: PubMed Central journal article supplement (PMC8526965; doi:10.3389/fimmu.2021.754106), 2021-10-06
Supplement: DataSheet_1.pdf [file DataSheet_1.pdf]

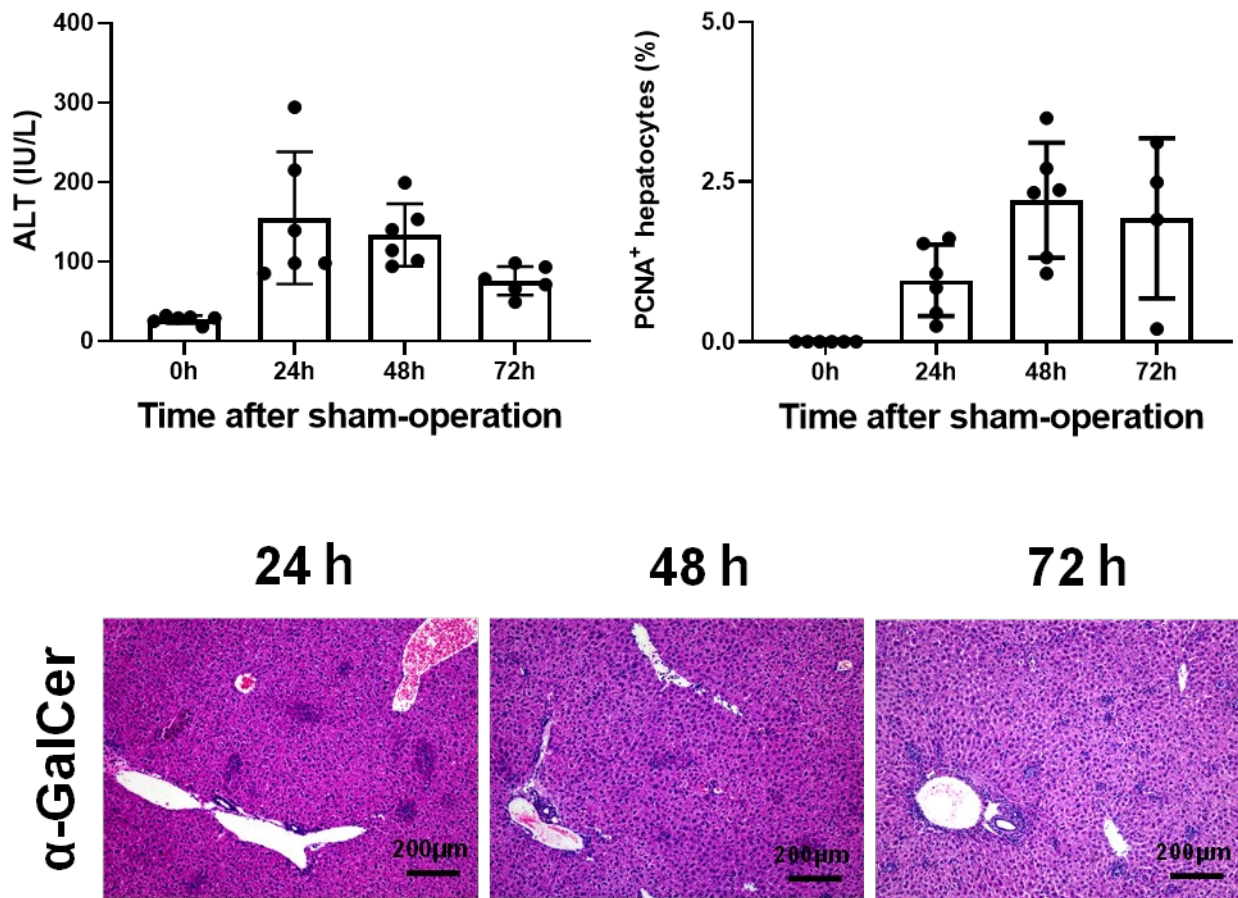

Supplementary Figure S1.

Liver injury and hepatocyte proliferation in sham-operated mice treated with  $\alpha$ -GalCer. ALT levels, representative photomicrographs of H&E-stained liver sections, and PCNA<sup>+</sup>-hepatocytes (%) after administration of  $\alpha$ -GalCer to sham-operated mice. Data are expressed as mean  $\pm$  SD (four–six biological replicates per group). Scale bars, 200  $\mu$ m.

**A**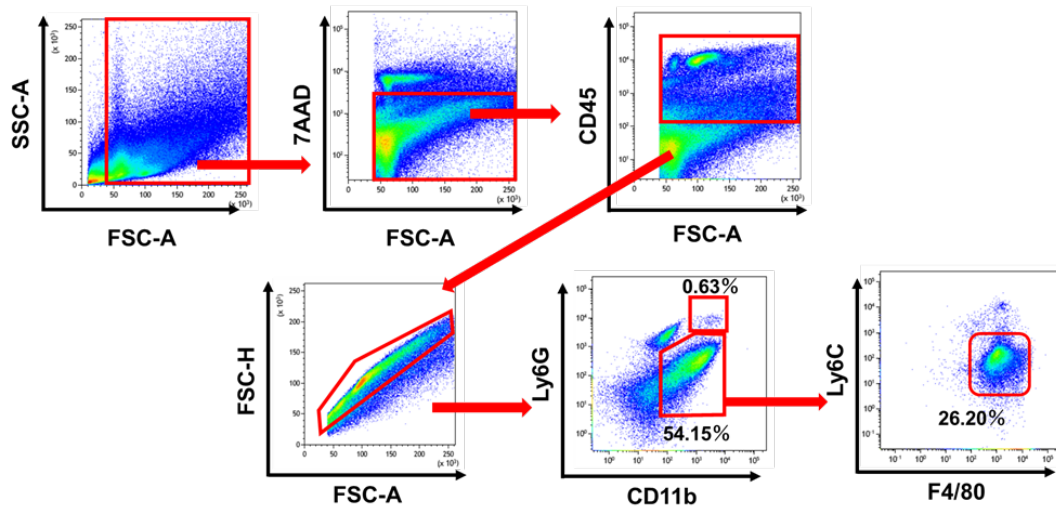**B**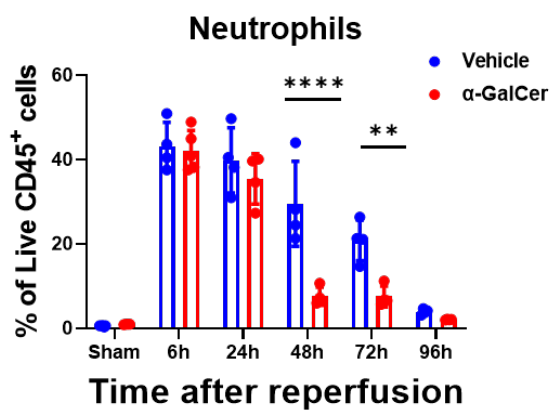**C**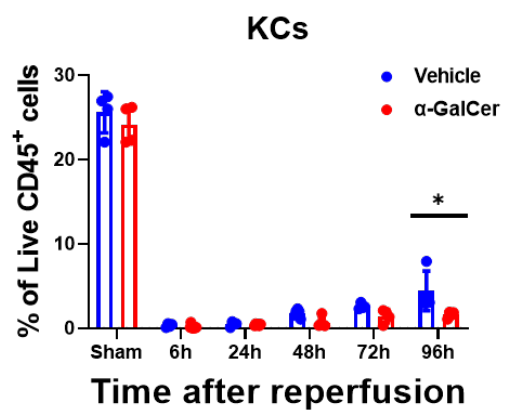

Supplementary Figure S2. Infiltration of immune cells after hepatic I/R injury.

(A) Flow cytometry gating strategy used to identify neutrophils and Kupffer cells (KCs) in livers from sham-operated mice. (B,C) Changes in the percentage of neutrophils (B) and KCs (C) in livers from mice treated with  $\alpha$ -GalCer or vehicle after hepatic I/R injury. Neutrophils were defined as CD45<sup>+</sup>/Ly6G<sup>+</sup>/CD11b<sup>+</sup> cells; KCs, CD45<sup>+</sup>/Ly6G<sup>low</sup>/Ly6C<sup>-</sup>/CD11b<sup>low</sup>/F4/80<sup>high</sup> -cells. Data are expressed as the mean  $\pm$  SD (four biological replicates per group). \*  $P < 0.05$ , \*\*  $P < 0.01$ , \*\*\*\*  $P < 0.0001$ .

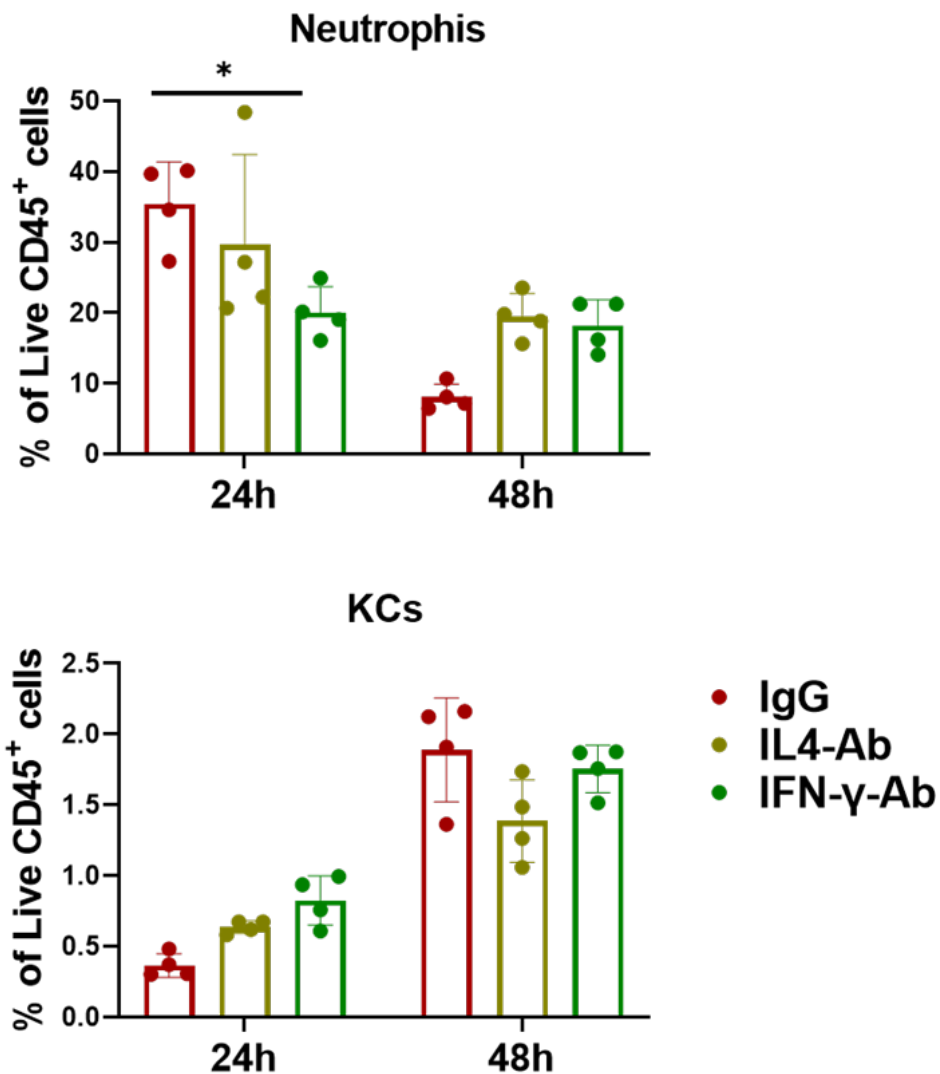

Supplementary Figure S3.

Effect of IL-4 or IFN- $\gamma$  blockade on the percentage of neutrophils and Kupffer cells after hepatic I/R injury. Anti-IL-4 or IFN- $\gamma$  neutralizing antibodies were administered to mice 1 h prior to the induction of ischemia, and  $\alpha$ -GalCer was given at the induction of ischemia. The percentage of neutrophils and Kupffer cells in livers from mice treated with anti-IL-4 antibodies and IgG. Neutrophils and Kupffer cells are defined as CD45<sup>+</sup>/Ly6G<sup>+</sup>/CD11b<sup>+</sup> cells and CD45<sup>+</sup>/Ly6G<sup>low</sup>/Ly6C<sup>-</sup>/CD11b<sup>low</sup>/F4/80<sup>high</sup> -cells, respectively. Data are expressed as the mean  $\pm$  SD (four biological replicates per group).

\*  $P < 0.05$ .

**A****CD1dF4/80DAPI**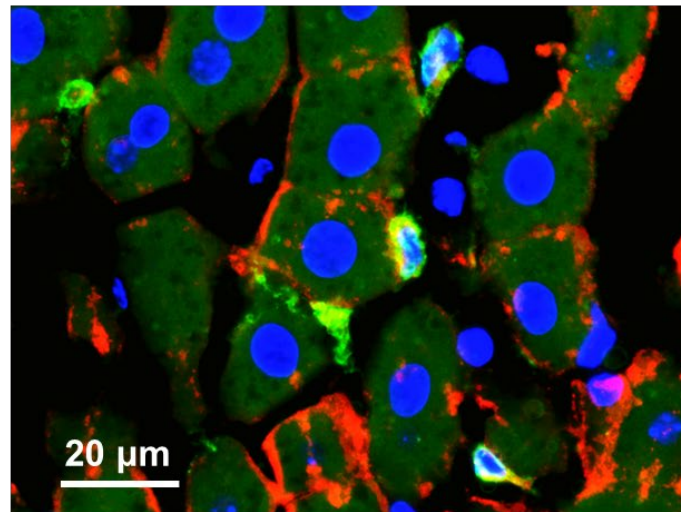**B**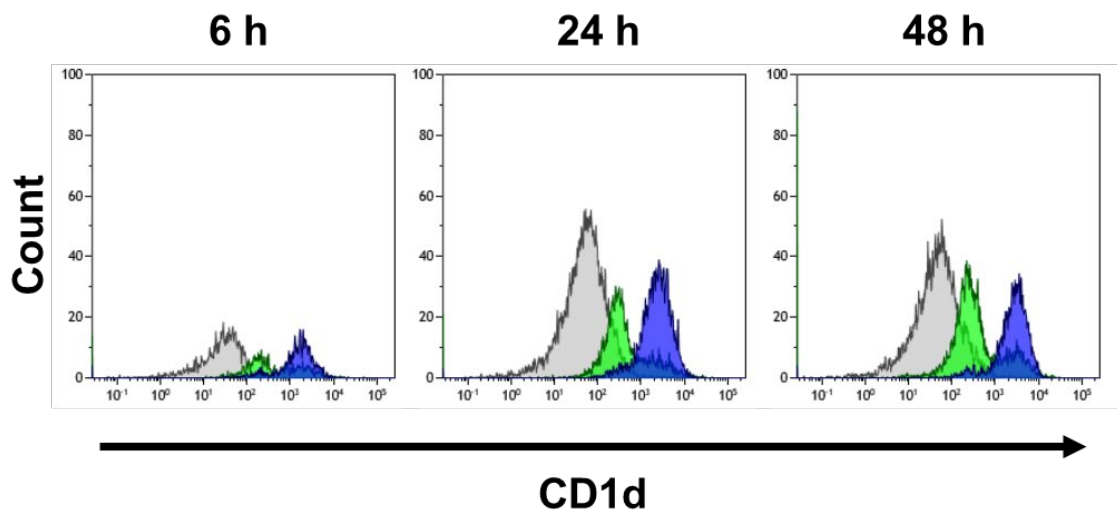

Supplementary Figure S4.

CD1d expression in the livers after hepatic I/R injury treated with  $\alpha$ -GalCer.

(A) Representative photo showing double staining of CD1d (red) and F4/80 (green) in livers treated with  $\alpha$ -GalCer at 6 h post-reperfusion. Yellow indicates double-positive cells. Nuclei are stained by DAPI (blue). Scale bar, 20  $\mu$ m. (B) The expression of CD1d in Ly6C<sup>high</sup> macrophages (Ly6G<sup>-</sup>/Ly6C<sup>high</sup>/CD11b<sup>high</sup>/F4/80<sup>high</sup> cells) and Ly6C<sup>low</sup> macrophages (Ly6G<sup>-</sup>/Ly6C<sup>low</sup>/CD11b<sup>high</sup>/F4/80<sup>high</sup> cells) at 6, 24, and 48 h post-reperfusion (light gray, isotype control; light green, Ly6C<sup>low</sup> macrophages and Ly6C<sup>high</sup> macrophages, light blue).

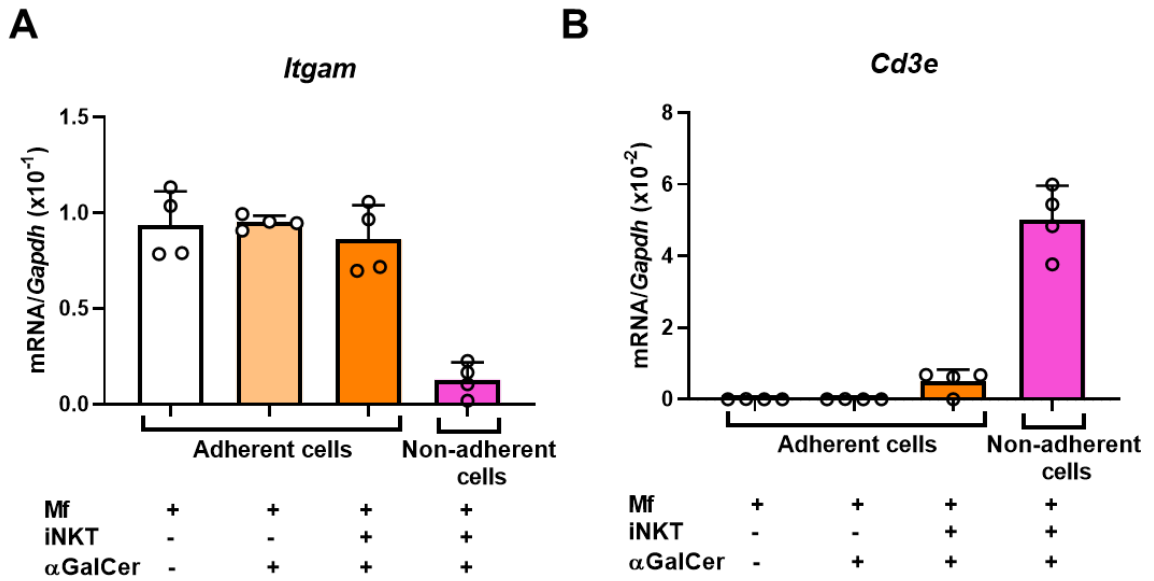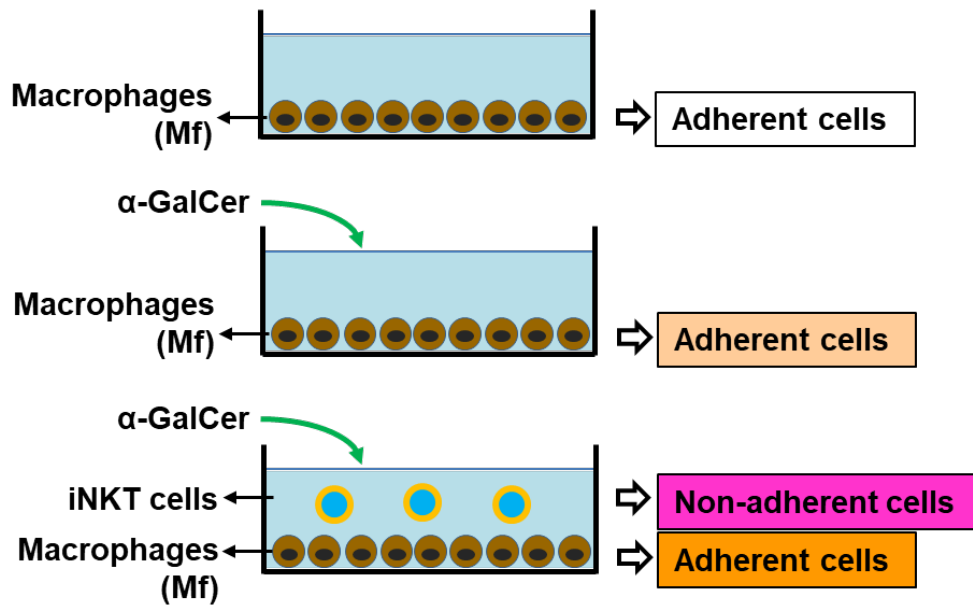

Supplementary Figure S5.

Characterization of adherent and non-adherent cells in co-culture of macrophages and activated iNKT cells.

(A,B) Expression of mRNA for *Itgam* (A) and *Cd3e* (B) in adherent and non-adherent cells in co-culture of macrophages and iNKT cells. Cultured bone marrow-derived macrophages and isolated iNKT cells were stimulated with  $\alpha$ -GalCer for 72 h. Then, mRNA levels of *Itgam* and *Cd3e* were determined from adherent and non-adherent cells to the wells. Data are expressed as the mean  $\pm$  SD (four mice per group, representative data from two independent experiments).

**A**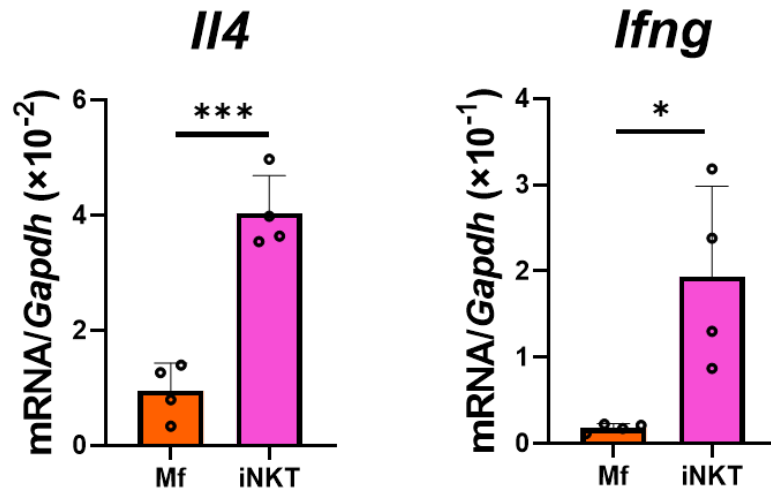**B**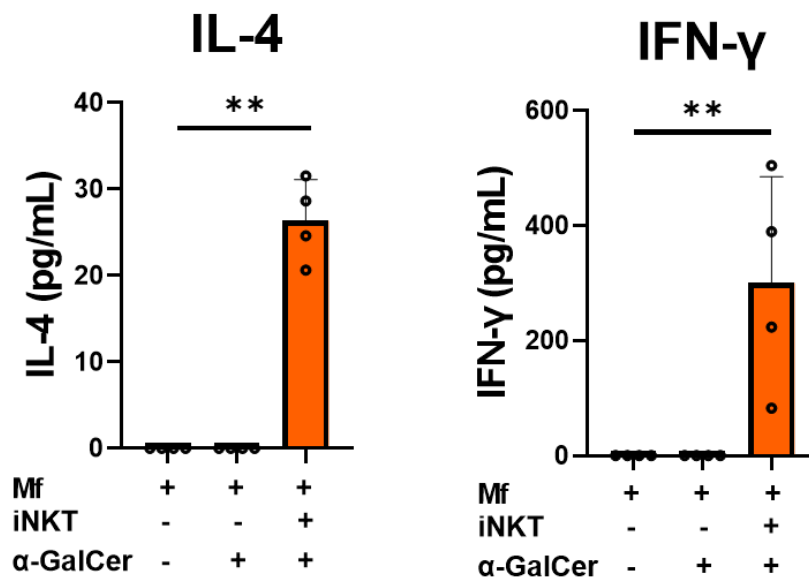

Supplementary Figure S6.

Production of IL-4 and IFN- $\gamma$  from iNKT cells in vitro.

(A) The levels of mRNA for *Il4* and *Ifng* from cultured activated iNKT cells and macrophages. Mf, macrophages. Data are expressed as the mean  $\pm$  SD (four mice per group, representative data from two independent experiments). \*  $P < 0.05$ , \*\*\*  $P < 0.001$ .

(B) The levels of IL-4 and IFN- $\gamma$  in supernatants from activated iNKT cells and macrophages. Mf, macrophages. Data are expressed as the mean  $\pm$  SD (four mice per group, representative data from two independent experiments). \*\*  $P < 0.01$ .

**A**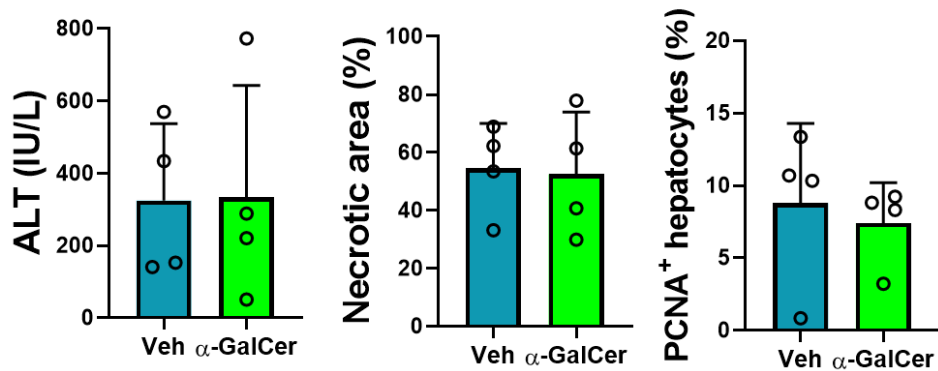**B**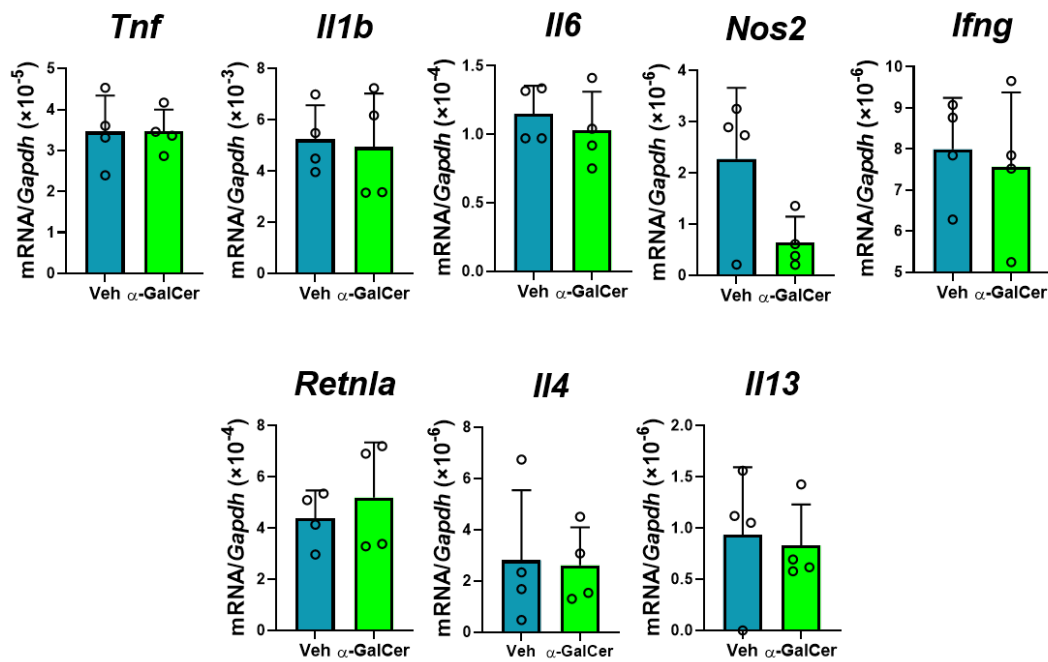

Supplementary Figure S7.

Liver repair after hepatic I/R injury in *Cd11d*<sup>-/-</sup> mice treated with  $\alpha$ -GalCer or vehicle.

(A) ALT levels, hepatic necrosis, and PCNA<sup>+</sup>-hepatocytes (%), and (B) expression of genes related to pro-inflammatory (*Tnf*, *Il1b*, *Il6*, *Nos2*, and *Ifng*) and reparative macrophages phenotypes (*Mrc1*, *Retn1a*, *Il4*, and *Il13*) at 72 h post-reperfusion. Data are expressed as the mean  $\pm$  SD (four biological replicates per group). Veh, vehicle.
